# Supplementary material for: Cold Atmospheric Plasma Restores Paclitaxel Sensitivity to Paclitaxel-Resistant Breast Cancer Cells by Reversing Expression of Resistance-Related Genes
Source: PubMed Central journal article supplement (PMC6966695; doi:10.3390/cancers11122011), 2019-12-13
Supplement: cancers-11-02011-s001.pdf [file cancers-11-02011-s001.pdf]

**Table S1.** Twenty genes that were deregulated in the MCF7/TxR but recovered by CAP.

| Gene Symbol | Accession No.  | Description                                                 | Fold change         |                               |
|-------------|----------------|-------------------------------------------------------------|---------------------|-------------------------------|
|             |                |                                                             | MCF-7 vs. MCF-7/TxR | MCF-7/TxR vs. MCF-7/TxR + CAP |
| TMEM164     | NM_017698.2    | transmembrane protein 165                                   | -2.471006           | 1.304404                      |
| RPS6KA2     | NM_021135.6    | ribosomal protein S6 kinase A2                              | -2.213120           | 1.529600                      |
| SLC44A1     | NM_080546.5    | solute carrier family 44 member 1                           | -1.495163           | 1.900823                      |
| TLE4        | NM_001282748.1 | TLE family member 4, transcriptional corepressor            | -2.565393           | 2.905084                      |
| DAGLA       | NM_006133.3    | diacylglycerol lipase alpha                                 | -1.810102           | 1.780053                      |
| ATF6B       | NM_004381.5    | activating transcription factor 6 beta                      | -1.729802           | 2.097785                      |
| FERMT3      | NM_031471.6    | fermitin family member 3                                    | -1.748523           | 2.241378                      |
| KCMF1       | NM_020122.5    | potassium channel modulatory factor 1                       | -1.335370           | 1.607224                      |
| PHKA1       | NM_002637.4    | phosphorylase kinase regulatory subunit alpha 1             | -1.922488           | 1.876008                      |
| LRRIQ3      | NM_001105659.2 | leucine rich repeats and IQ motif containing 3              | -1.371887           | 1.346779                      |
| ESYT3       | NM_001322831.2 | extended synaptotagmin 3                                    | -1.085915           | -1.582270                     |
| UBXN8       | NM_005671.4    | UBX domain protein 8                                        | 1.563599            | -1.525176                     |
| CNTD2       | NM_024877.4    | cyclin N-terminal domain containing 2                       | 2.149036            | -1.797696                     |
| ZNF304      | NM_001290318.1 | zinc finger protein 304                                     | 2.056123            | -1.683319                     |
| GOLM1       | NM_016548.4    | golgi membrane protein 1                                    | 2.085563            | -3.506264                     |
| CEACAM1     | NM_001712.5    | CEA cell adhesion molecule 1                                | 4.416401            | -1.551493                     |
| WNT7B       | NM_058238.3    | Wnt family member 7B                                        | 2.310505            | -1.522427                     |
| KIF13B      | NM_015254.4    | kinesin family member 13B                                   | 3.209376            | -1.973119                     |
| AQP3        | NM_004925.5    | aquaporin 3 (Gill blood group)                              | 1.822655            | -1.575980                     |
| IFIT1       | NM_001548.5    | interferon induced protein with tetratricopeptide repeats 1 | 8.551776            | -1.313550                     |

**Table S2.** Information of primers employed in this study.

| Gene           | Sequence (5'–3')            | Supplier |
|----------------|-----------------------------|----------|
| <i>KIF13B</i>  | F: AGCTACAAGGATATTGAGTCGTT  | Bionics  |
|                | R: TCTCTCCAGATGTCCCAGAC     |          |
| <i>CEACAM1</i> | F: CCATCATGCTGAACGTAAACTAT  |          |
|                | R: CTTGCCCTGCCGGTCTTC       |          |
| <i>GOLM1</i>   | F: AGTTCTCCTACGACCTGAGC     |          |
|                | R: TTGGAGCTGCTGTCTCTGG      |          |
| <i>TLE4</i>    | F: TTCCTGTCCCAAGAGCACC      |          |
|                | R: GCCTGGAGTTGTTGCCCAA      |          |
| <i>PHKA1</i>   | F: ATGATCAGACAGGTGGATAAAAGT |          |
|                | R: TATGGAGTCCTGAGGCAGTC     |          |
| <i>DAGLA</i>   | F: CCCAGTCAGATGCCTACTCA     |          |
|                | R: GTCATTGTTTGCCCTCGTCCA    |          |

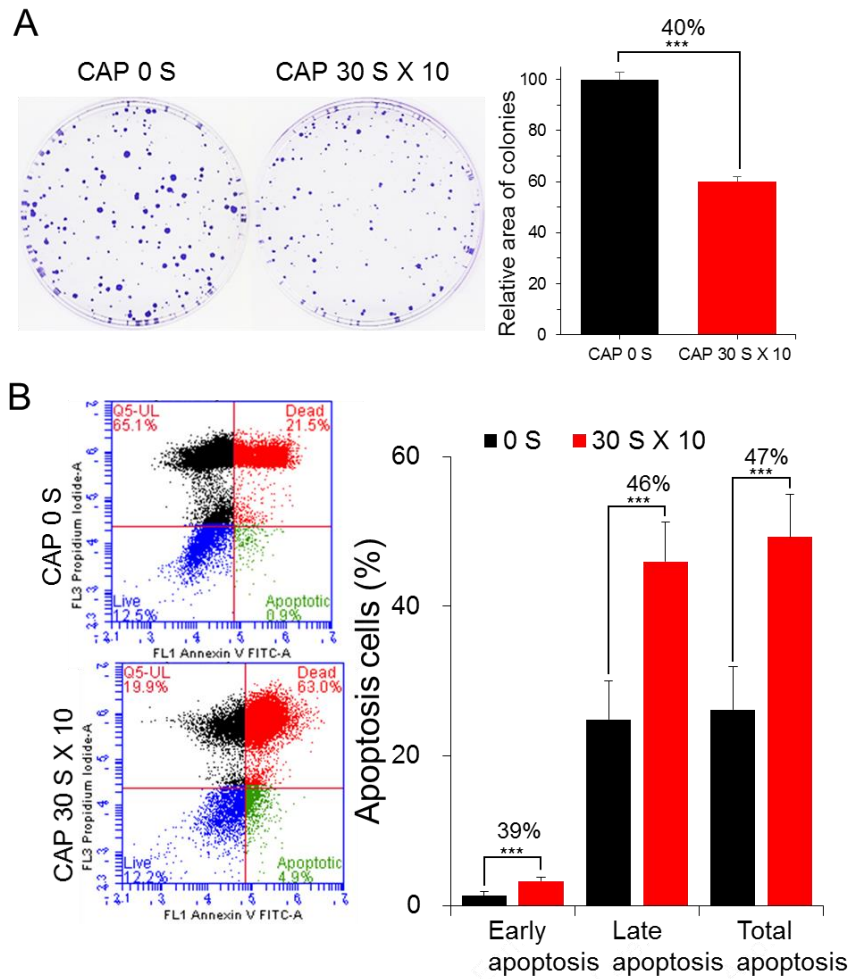

**Figure S1.** Inhibition of cell growth for MCF-7 by CAP. MCF-7 cells were treated with plasma for 10 times (30 sec each time with an hour interval between exposures), and cell growth and apoptosis were analyzed by colony formation assay (A) and FACS (B), respectively. All experiments were performed in triplicate and indicated as mean  $\pm$  SE. \*\*\*  $p < 0.001$ .

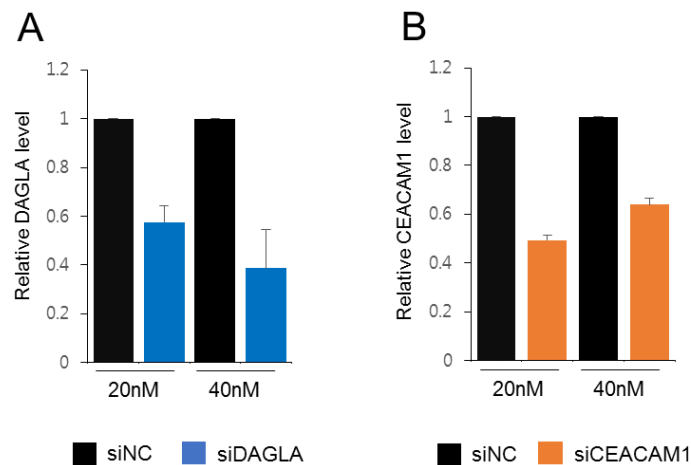

**Figure S2.** Induction of downregulation of DAGLA and CEACAM1 in MCF-7/TxR cells. Cultured cells were transiently transfected with a gene-specific siRNA to downregulate DAGLA (A) and CEACAM1 (B) in MCF-7/TxR cells. Expression of the gene was determined by real-time RT-PCR. Based on the downregulated level, 40 and 20 nM of siRNA were selected for DAGLA and CEACAM1, respectively. All experiments were performed in triplicate and indicated as mean  $\pm$  SE. NC, negative control vector, or siRNA.

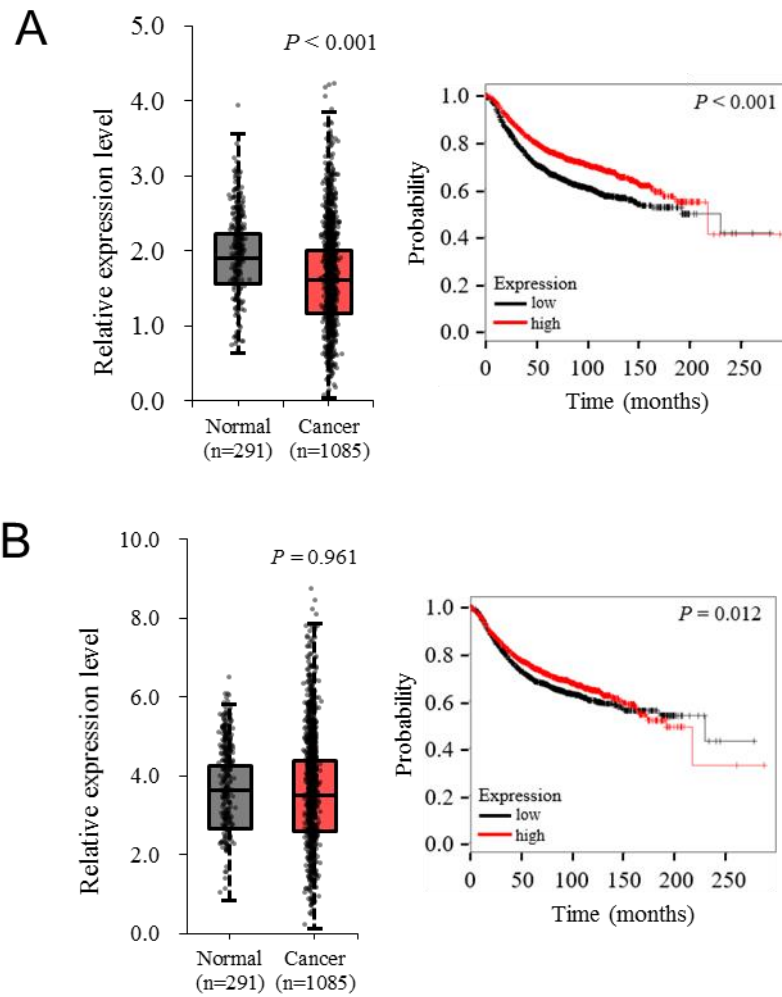

**Figure S3.** Kaplan–Meier survival analysis of breast cancer patients with altered expression of DAGLA and CEACAM1. **(A)** DAGLA is downregulated in breast cancer tissues compared to normal tissues, analyzed by box plot (left). Higher expression of DAGLA is significantly associated with a higher DMFS compared to lower expression (right). **(B)** For CEACAM1, no significant difference in either expression or DMSF was found between normal and cancer tissues. DMFS stands for distant metastasis free survival, meaning the period until metastasis is detected. Samples were stratified into two quantiles based on gene expression, low (gray) and high (red).

Fig. 6A

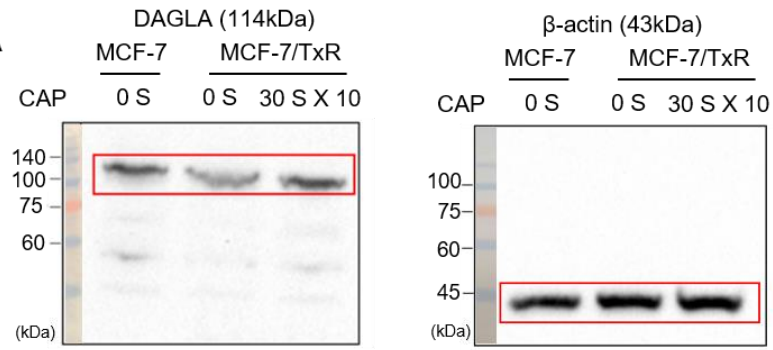

| cell line      | MCF-7         | MCF-7/TxR     |               |
|----------------|---------------|---------------|---------------|
| PLASMA         | 0S            | 0S            | 30S x10       |
| $\beta$ -actin | 11,574,376.00 | 13,091,020.00 | 13,047,160.00 |
| DAGLA          | 9,318,288.00  | 7,707,548.00  | 9,054,968.00  |

Fig. 6B

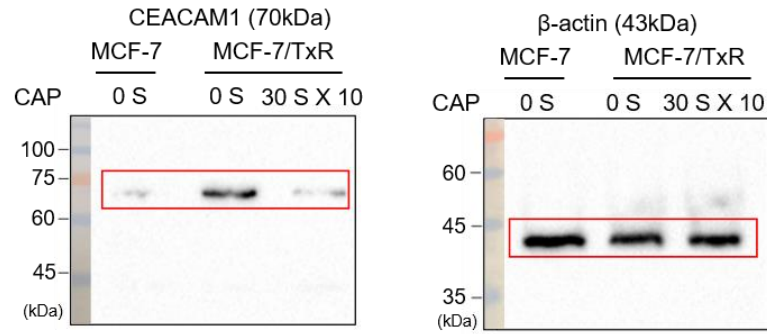

| cell line      | MCF-7        | MCF-7/TxR    |              |
|----------------|--------------|--------------|--------------|
| PLASMA         | 0S           | 0S           | 30S x10      |
| $\beta$ -actin | 6,105,432.00 | 3,957,516.00 | 4,258,412.00 |
| CEACAM1        | 532,660.00   | 4,013,164.00 | 777,276.00   |

Figure S4. Cont.

Fig. 6C

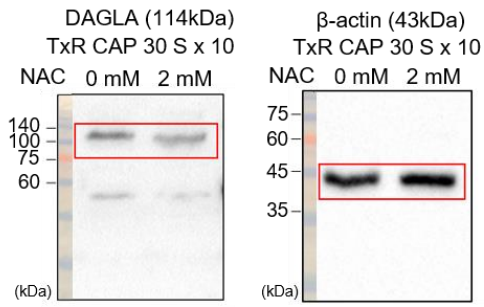

| cell line      | MCF-7/TxR    |              |
|----------------|--------------|--------------|
| NAC            | 0mM          | 2mM          |
| $\beta$ -actin | 2,260,692.00 | 2,706,308.00 |
| DAGLA          | 4,342,148.00 | 3,547,144.00 |

Fig. 6D

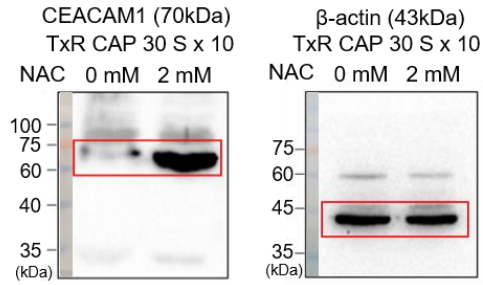

| cell line      | MCF-7/TxR     |                |
|----------------|---------------|----------------|
| NAC            | 0mM           | 2mM            |
| $\beta$ -actin | 8,988,948.00  | 7,781,276.00   |
| CEACAM1        | 14,689,992.20 | 310,123,318.84 |

**Figure S4.** Uncropped blots corresponding to Western blots in the main text. Boxed areas correspond to the images in the main text.
